# Supplementary material
Source: Springer Nature journal article supplement (https://www.springermedizin.de/resource/supplementary/12877_2010_608_MOESM3_ESM.pdf/9439954)

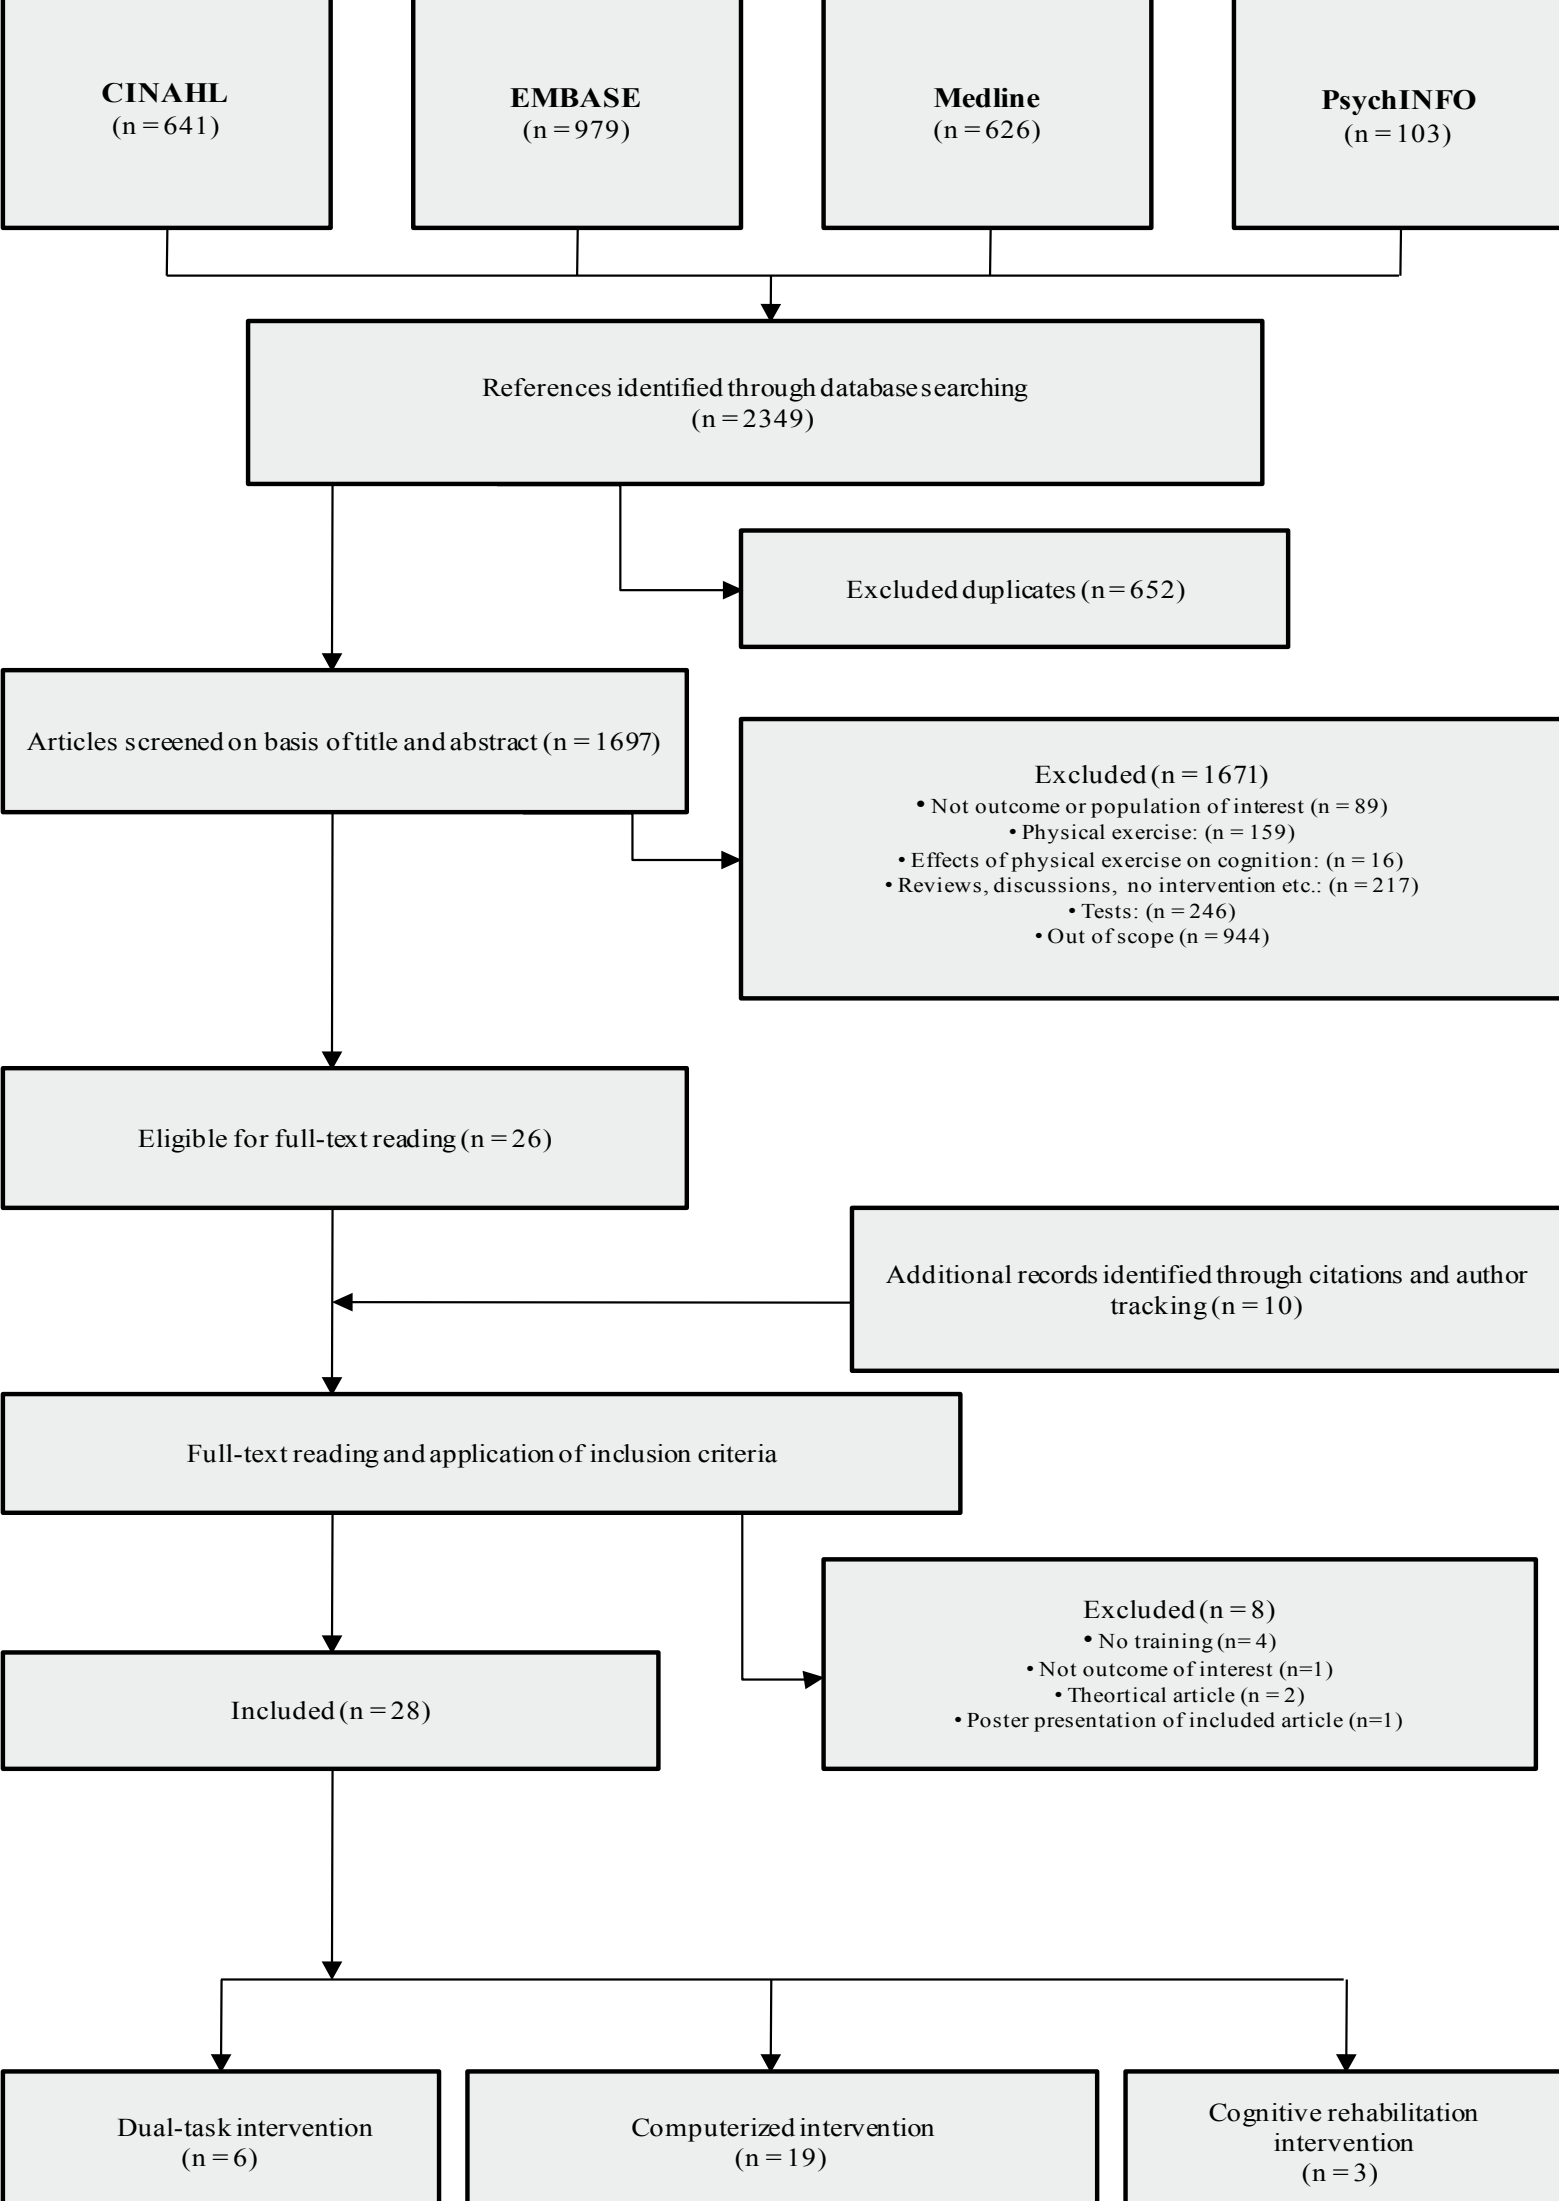

Supplement: MOESM3 [file 9439954]
